# Supplementary figures and images for: Contemporary Avian Influenza A Virus Subtype H1, H6, H7, H10, and H15 Hemagglutinin Genes Encode a Mammalian Virulence Factor Similar to the 1918 Pandemic Virus H1 Hemagglutinin
Source: PubMed Central journal article supplement — mBio. 2014 Nov 18;5(6):e02116-14. doi: 10.1128/mBio.02116-14 (PMC4251996; doi:10.1128/mbio.02116-14), 2014-11-18

H1<sup>PB2-E627</sup>

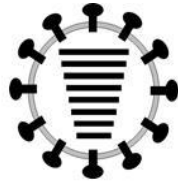

H1<sup>PB2-E627K</sup>

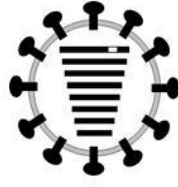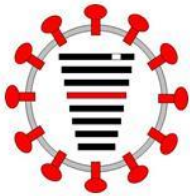

H2

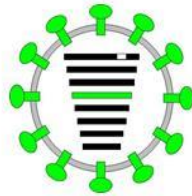

H3

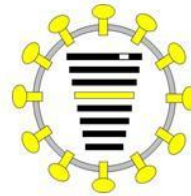

H5

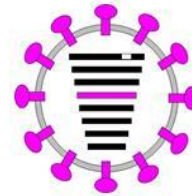

H6

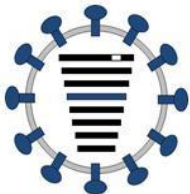

H7

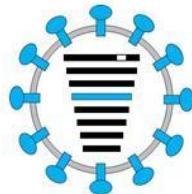

H7-Shanghai

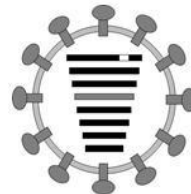

H7-Anhui

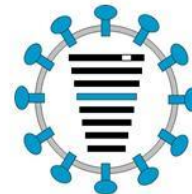

H9

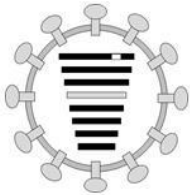

H10

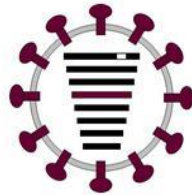

H11

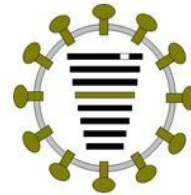

H13

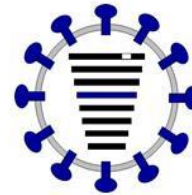

H14

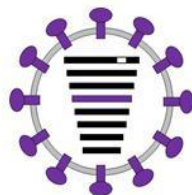

H15

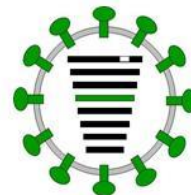

H16

Supplement: mbo006142062sf1.pdf [file mbo006142062sf1.pdf]

**A**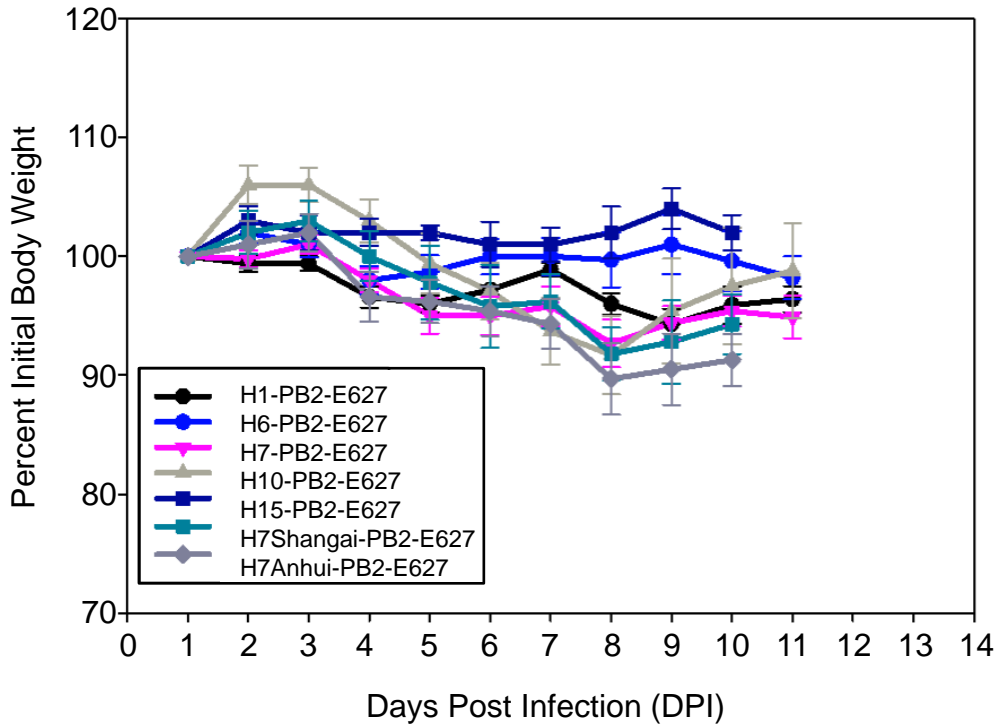**B**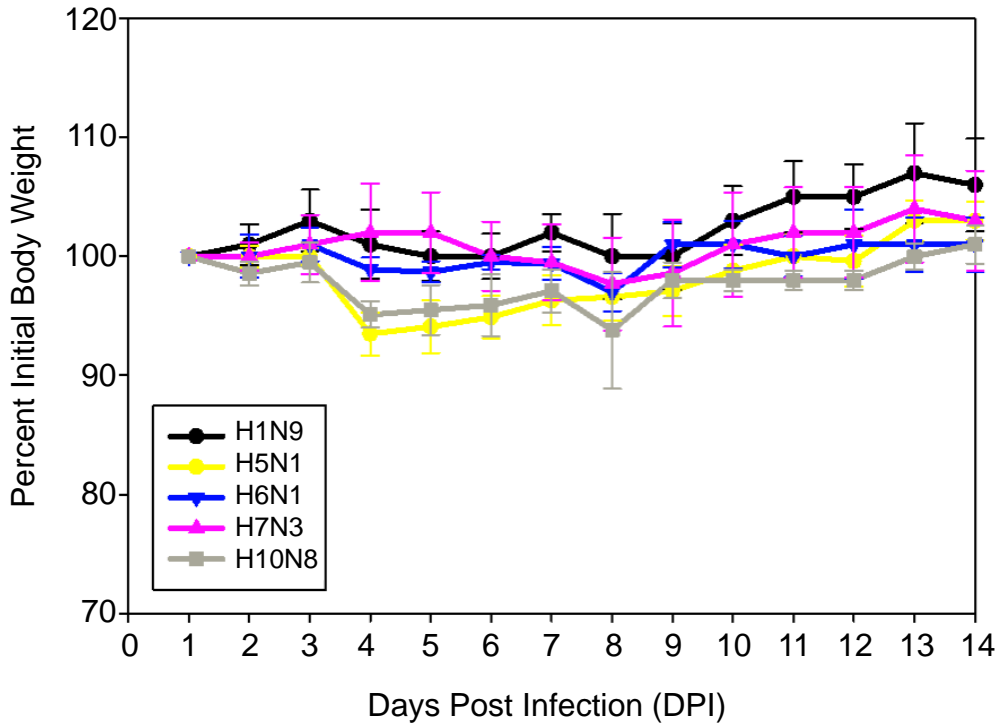

Supplement: mbo006142062sf2.pdf [file mbo006142062sf2.pdf]
